# Supplementary material
Source: publisher figshare collection journal article supplement (https://f1000.figshare.com/articles/dataset/_/106729)
Supplement: Supplementary file 1 [file 1]

|   | Group A | Group B | Group C | Group D | Group E | Group F | Group G    | Group H    | Group I    |
|---|---------|---------|---------|---------|---------|---------|------------|------------|------------|
|   |         |         |         |         |         |         | Data Set-G | Data Set-H | Data Set-I |
|   | Y       | Y       | Y       | Y       | Y       | Y       | Y          | Y          | Y          |
| 1 | 3535    | 1892033 | 128643  | 1089341 | 372379  | 1502145 |            |            |            |
| 2 | 2548    | 1777784 | 1111111 | 629119  | 447155  | 1030962 |            |            |            |
| 3 | 4745    | 1595858 | 115199  | 904672  | 388902  | 1380914 |            |            |            |
| 4 | 1804    | 1482698 | 99433   | 716278  | 468012  | 1183553 |            |            |            |
| 5 | 4544    | 835727  | 64624   | 421169  | 251505  | 693060  |            |            |            |
| 6 | 9834    | 800360  | 69809   | 332671  | 367105  | 528126  |            |            |            |
| 7 | 4745    | 1195858 | 136083  | 334650  | 206567  | 993303  |            |            |            |
| 8 | 10084   | 1082698 | 114584  | 551667  | 188231  | 544434  |            |            |            |
