# Supplementary material
Source: publisher figshare collection journal article supplement (https://f1000.figshare.com/articles/dataset/_/106729)
Supplement: Supplementary file 3 [file 1]

|   | Group A | Group B | Group C | Group D | Group E | Group F | Group G    | Group H    | Group I    |
|---|---------|---------|---------|---------|---------|---------|------------|------------|------------|
|   |         |         |         |         |         |         | Data Set-G | Data Set-H | Data Set-I |
|   | Y       | Y       | Y       | Y       | Y       | Y       | Y          | Y          | Y          |
| 1 | 3061    | 1691058 | 143593  | 1348372 | 856763  | 1307296 |            |            |            |
| 2 | 3375    | 1475709 | 124097  | 1101259 | 427440  | 1898611 |            |            |            |
| 3 | 4745    | 995858  | 115199  | 604672  | 388902  | 980914  |            |            |            |
| 4 | 1804    | 882698  | 299433  | 416278  | 468012  | 883553  |            |            |            |
| 5 | 4788    | 1691616 | 438135  | 1171859 | 472170  | 1093060 |            |            |            |
| 6 | 6680    | 1075142 | 347195  | 813856  | 587818  | 1528126 |            |            |            |
| 7 | 1673    | 1135115 | 122428  | 627934  | 328976  | 723231  |            |            |            |
| 8 | 3379    | 1028156 | 103781  | 375533  | 304035  | 417945  |            |            |            |
