# Supplementary material
Source: publisher figshare collection journal article supplement (https://f1000.figshare.com/articles/dataset/_/106729)
Supplement: Supplementary file 5 [file 1]

|   | Group A | Group B | Group C | Group D | Group E | Group F | Group G    | Group H    | Group I    |
|---|---------|---------|---------|---------|---------|---------|------------|------------|------------|
|   |         |         |         |         |         |         | Data Set-G | Data Set-H | Data Set-I |
|   | Y       | Y       | Y       | Y       | Y       | Y       | Y          | Y          | Y          |
| 1 | 2854    | 592568  | 85657   | 331377  | 298723  | 805080  |            |            |            |
| 2 | 10741   | 779512  | 90492   | 369309  | 229625  | 411547  |            |            |            |
| 3 | 5638    | 1232676 | 342362  | 938185  | 540967  | 1490975 |            |            |            |
| 4 | 11419   | 1487252 | 421473  | 664920  | 531816  | 908836  |            |            |            |
| 5 | 3456    | 1124586 | 322354  | 802756  | 222269  | 456160  |            |            |            |
| 6 | 11478   | 1088878 | 163744  | 657915  | 350558  | 854290  |            |            |            |
| 7 | 4745    | 1595858 | 395131  | 907363  | 449038  | 1222956 |            |            |            |
| 8 | 180084  | 1482698 | 329248  | 786952  | 741406  | 1067947 |            |            |            |
