# Supplementary material
Source: publisher figshare collection journal article supplement (https://f1000.figshare.com/articles/dataset/_/106729)
Supplement: Supplementary file 7 [file 1]

|   | Group A | Group B | Group C | Group D | Group E | Group F | Group G    | Group H    | Group I    |
|---|---------|---------|---------|---------|---------|---------|------------|------------|------------|
|   |         |         |         |         |         |         | Data Set-G | Data Set-H | Data Set-I |
|   | Y       | Y       | Y       | Y       | Y       | Y       | Y          | Y          | Y          |
| 1 | 2273    | 854032  | 105921  | 345865  | 203973  | 848357  |            |            |            |
| 2 | 7637    | 1108323 | 109209  | 384845  | 260978  | 458183  |            |            |            |
| 3 | 4166    | 1724736 | 280512  | 969418  | 368728  | 1014850 |            |            |            |
| 4 | 8098    | 2071022 | 334316  | 688613  | 597014  | 1811167 |            |            |            |
| 5 | 4544    | 835727  | 289400  | 633805  | 230088  | 520850  |            |            |            |
| 6 | 9834    | 800360  | 146764  | 493526  | 365814  | 979864  |            |            |            |
| 7 | 4745    | 1595858 | 395131  | 907363  | 449038  | 1222956 |            |            |            |
| 8 | 180084  | 1482698 | 329248  | 786952  | 741406  | 1067947 |            |            |            |
